# Supplementary material
Source: ML conference proceedings conference paper supplement (https://openreview.net/forum?id=yAygQe3Uxd)
Supplement: supplementary_material [file attachment]

# Supplementary Materials: Transferable Diffusion-based Unrestricted Adversarial Attack on Pre-trained Vision-Language Models

Anonymous Authors

## 1 DENOISING DIFFUSION IMPLICIT MODELS

Denoising Diffusion Probabilistic Models (DDPMs) [1] are the state-of-the-art generative models employed for image generation, where an iterative denoising of an initial Gaussian noise is conducted. DDPMs contain both an inversion process and a denoising process. In the inversion process, Gaussian noise is gradually added to an image  $x_0$  for a total timestep  $T$  to get latents  $x_1, x_2, \dots, x_T$  in the following equation:

$$q(x_t|x_{t-1}) = \mathcal{N}(\sqrt{1 - \beta_t}x_{t-1}, \beta_t\mathbf{I}), \quad (1)$$

where  $t \in [1, T]$  and  $\beta \in (0, 1)$ . When  $T$  is large enough, the last latent  $x_T$  will be approximately a pure Gaussian noise. According to the additivity of Gaussian distributions,  $x_t$  can be directly calculated using  $x_0$ :

$$\begin{aligned} q(x_t|x_0) &= \mathcal{N}(\sqrt{\bar{\alpha}_t}x_0, (1 - \bar{\alpha}_t)\mathbf{I}), \\ x_t &= \sqrt{\bar{\alpha}_t}x_0 + \sqrt{1 - \bar{\alpha}_t}\epsilon, \end{aligned} \quad (2)$$

where  $\epsilon \sim \mathcal{N}(0, \mathbf{I})$ ,  $\alpha_t = 1 - \beta_t$ ,  $\bar{\alpha}_t = \prod_{s=0}^t \alpha_s$ .

In the denoising process, a new sample is drawn from  $x_T$  by iteratively sampling from  $q(x_{t-1}|x_t)$ . Since  $q(x_{t-1}|x_t)$  is hard to calculate for the distribution of  $x_0$  is unknown, a neural network  $p_\theta$  with parameters denoted as  $\theta$  is trained to predict the mean and covariance of  $q(x_{t-1}|x_t)$ :

$$p_\theta(x_{t-1}|x_t) = \mathcal{N}(\mu_\theta(x_t, t), \Sigma_\theta(x_t, t)). \quad (3)$$

Ho *et al.* [1] proposed to predict the noise  $\epsilon_\theta(x_t, t)$  to simplify the objective:

$$\min_{\theta} \mathcal{L}(\theta) = \mathbb{E}_{x_0, \epsilon, t} \|\epsilon - \epsilon_\theta(x_t, t)\|_2^2. \quad (4)$$

After  $p_\theta$  is fully trained, we can sample  $x_{t-1}$  as follows:

$$x_{t-1} = \mu_\theta(x_t, t) + \sigma_t z, z \sim \mathcal{N}(0, \mathbf{I}). \quad (5)$$

Song *et al.* [3] proposed Denoising Diffusion Implicit Models (DDIMs) to accelerate sampling in DDPMs. In DDIMs, the denoising process is no more a Markovian process:

$$x_{t-1} = \sqrt{\bar{\alpha}_{t-1}} \left( \frac{x_t - \sqrt{1 - \bar{\alpha}_t} \epsilon_\theta(x_t)}{\sqrt{\bar{\alpha}_t}} \right) + \sqrt{1 - \bar{\alpha}_{t-1} - \sigma_t^2} \cdot \epsilon_\theta(x_t) + \sigma_t z. \quad (6)$$

where  $z \sim \mathcal{N}(0, \mathbf{I})$ . In DDIMs,  $\sigma_t$  is set to 0 to make the denoising process determined. The reversion of the denoising process is called DDIM inversion.

## 2 EXPERIMENTAL RESULTS ON MSCOCO DATASET

Besides Flickr30k Dataset, we also conduct experiments on image-text and text-image retrieval tasks on MSCOCO dataset. According to the conclusions in the ablations studies (Section 4.2), increasing either relative weight control factor  $\mu$  or guidance scale  $\omega$  could effectively improve the attack performance under both white-box and black-box settings. With relative weight control factor  $\mu = 0.5$  and guidance scale  $\omega = 2.5$ , our method MDA have surpassed all other compared attack methods except SGA under white-box settings, as shown in Section 4.2. Therefore, different from the experiments conducted on Flickr30k dataset, we here choose a larger guidance scale  $\omega = 5$  to test whether our method MDA could surpass state-of-the-art attack method SGA [2] under white-box settings. The experimental results are listed in Table 1. From Table 1 we could see that our method MDA achieves the best results both under white-box and black-box settings, successfully surpassing the attack performance of SGA. (in image-text retrieval task, MDA outperforms SGA by over 5% under white-box settings and over 30% under black-box settings.) This is because a larger guidance scale indicates a stronger guidance by adversarial text, which introduces more distortions in the denoising process, thus enhancing attack performance.

## REFERENCES

- [1] Jonathan Ho, Ajay Jain, and Pieter Abbeel. 2020. Denoising diffusion probabilistic models. *Advances in neural information processing systems* 33 (2020), 6840–6851.
- [2] Dong Lu, Zhiqiang Wang, Teng Wang, Weili Guan, Hongchang Gao, and Feng Zheng. 2023. Set-level guidance attack: Boosting adversarial transferability of vision-language pre-training models. In *Proceedings of the IEEE/CVF International Conference on Computer Vision*. 102–111.
- [3] Jiaming Song, Chenlin Meng, and Stefano Ermon. 2020. Denoising Diffusion Implicit Models. In *International Conference on Learning Representations*.

**Table 1: ASR on image-text and text-image retrieval tasks on MSCOCO dataset. ALBEF is adopted as the surrogate model. \* indicates the performance under white-box attack. The best results are highlighted in bold.**

| Task       | Attack      | ALBEF         |               |               | TCL          |              |              | CLIP <sub>ViT</sub> |              |              | CLIP <sub>CNN</sub> |              |              |
|------------|-------------|---------------|---------------|---------------|--------------|--------------|--------------|---------------------|--------------|--------------|---------------------|--------------|--------------|
|            |             | R@1           | R@5           | R@10          | R@1          | R@5          | R@10         | R@1                 | R@5          | R@10         | R@1                 | R@5          | R@10         |
| Image-Text | PGD         | 76.70*        | 67.49*        | 62.47*        | 12.46        | 5.00         | 3.14         | 13.96               | 7.33         | 5.21         | 17.45               | 9.08         | 6.45         |
|            | BERT-Attack | 24.39*        | 10.67*        | 6.75*         | 24.34        | 9.92         | 6.25         | 44.94               | 27.97        | 22.55        | 47.73               | 29.56        | 23.10        |
|            | Sep-Attack  | 82.60*        | 73.20*        | 67.58*        | 32.83        | 15.52        | 10.10        | 44.03               | 27.60        | 21.84        | 46.96               | 29.83        | 23.15        |
|            | Co-Attack   | 79.87*        | 68.62*        | 62.88*        | 32.62        | 15.36        | 9.67         | 44.89               | 28.33        | 21.89        | 47.30               | 29.89        | 23.29        |
|            | SGA         | 96.75*        | 92.83*        | 90.37*        | 58.56        | 39.00        | 30.68        | 57.06               | 39.38        | 31.55        | 58.95               | 42.49        | 34.84        |
|            | MDA         | <b>99.51*</b> | <b>98.64*</b> | <b>97.51*</b> | <b>93.35</b> | <b>80.61</b> | <b>73.55</b> | <b>93.11</b>        | <b>80.62</b> | <b>75.40</b> | <b>94.01</b>        | <b>81.50</b> | <b>76.15</b> |
| Text-Image | PGD         | 86.30*        | 78.49*        | 73.94*        | 17.77        | 8.36         | 5.32         | 23.10               | 12.74        | 9.43         | 23.54               | 13.26        | 9.61         |
|            | BERT-Attack | 36.13*        | 23.71*        | 18.94*        | 33.39        | 20.21        | 15.56        | 52.28               | 38.06        | 32.04        | 54.75               | 41.39        | 35.11        |
|            | Sep-Attack  | 89.88*        | 82.60*        | 78.80*        | 42.92        | 27.04        | 20.65        | 54.46               | 40.12        | 33.46        | 55.88               | 41.30        | 35.18        |
|            | Co-Attack   | 87.83*        | 80.16*        | 75.98*        | 43.09        | 27.32        | 21.35        | 54.75               | 40.00        | 33.81        | 55.64               | 41.48        | 35.28        |
|            | SGA         | 96.95*        | 93.44*        | 91.00*        | 65.38        | 47.61        | 38.96        | 65.25               | 50.42        | 43.47        | 66.52               | 52.44        | 45.05        |
|            | MDA         | <b>99.63*</b> | <b>98.57*</b> | <b>96.91*</b> | <b>95.67</b> | <b>84.66</b> | <b>76.52</b> | <b>94.80</b>        | <b>83.98</b> | <b>77.22</b> | <b>94.91</b>        | <b>84.05</b> | <b>78.84</b> |
